# Supplementary material for: Quantum mechanical molecular dynamics simulations of polaron formation in methylammonium lead iodide perovskite
Source: Royal Society of Chemistry journal article supplement (doi:10.1039/c9cp04739e), 2019-11-27
Supplement: c9cp04739e1.pdf [file c9cp04739e1.pdf]

# Quantum Mechanical Molecular Dynamics

## Simulations of Polaron Formation in

### Methylammonium Lead Iodide Perovskite

Hiroki Uratani,<sup>†</sup> Chien-Pin Chou,<sup>‡</sup> and Hiromi Nakai<sup>\*,†,‡,¶</sup>

<sup>†</sup>*Department of Chemistry and Biochemistry, School of Advanced Science and Engineering,  
Waseda University, 3-4-1, Okubo, Shinjuku-ku, Tokyo 169-8555, Japan*

<sup>‡</sup>*Waseda Research Institute for Science and Engineering (WISE), 3-4-1 Okubo,  
Shinjuku-ku, Tokyo 169-8555, Japan*

<sup>¶</sup>*Elements Strategy Initiative for Catalysts and Batteries (ESICB), Kyoto University,  
Katsura, Kyoto 615-8245, Japan*

E-mail: nakai@waseda.jp

Table S1: Electronic parameters for Pb (in atomic units).

| orbital type | $W$     | $a$     | $r_0$   |
|--------------|---------|---------|---------|
| s            | 6.76254 | 5.60847 | 4.54346 |
| p            | 5.33981 | 9.14422 | 4.42425 |
| d            | 4.58160 | 5.96026 | 4.80418 |
| f            | 2.40562 | 2.83573 | 5.82248 |
| density      | 7.01658 | 5.55764 | 4.23132 |

Table S2: Pb-I repulsive potential parameters (in atomic units).

| $R_0$     | $a_i$              |                     |                     | $c_i$               |                     |                     |                     |
|-----------|--------------------|---------------------|---------------------|---------------------|---------------------|---------------------|---------------------|
|           | $a_1$              | $a_2$               | $a_3$               | $c_1$               | $c_2$               | $c_3$               | $c_4$               |
|           | 2.067509E+00       | 5.616456E+00        | -7.032404E-03       |                     |                     |                     |                     |
| 4.300000  | 3.082860992619E-02 | -7.827799356081E-02 | -3.003160069907E-02 | 8.092023408549E-02  | 8.092023408549E-02  | -3.003160069907E-02 | 5.128927793232E-05  |
| 4.609800  | 1.345202267925E-02 | -3.678065883753E-02 | -2.996804302586E-02 | 5.303839964651E-02  | 5.303839964651E-02  | -2.996804302586E-02 | 2.414304304420E-03  |
| 4.826300  | 7.676232444769E-03 | -1.793104068906E-02 | -2.787725549823E-02 | 3.425313895081E-02  | 3.425313895081E-02  | -2.787725549823E-02 | 1.727706606781E-04  |
| 4.831400  | 7.585671363570E-03 | -1.758383384233E-02 | -2.787373097675E-02 | 3.382664390428E-02  | 3.382664390428E-02  | -2.787373097675E-02 | 7.729573645229E-03  |
| 5.622500  | 4.072295874378E-03 | -1.089048277048E-03 | -3.414268133792E-03 | -3.301260240250E-03 | -3.301260240250E-03 | -3.414268133792E-03 | 7.967429589431E-03  |
| 5.898700  | 3.494087064850E-03 | -3.022546521069E-03 | 5.388148076612E-03  | -2.483481779939E-03 | -2.483481779939E-03 | 5.388148076612E-03  | -4.197780308028E-03 |
| 6.171900  | 2.56944999077E-03  | -3.515425857717E-03 | 8.008137559991E-04  | 5.275477906474E-05  | 5.275477906474E-05  | 8.008137559991E-04  | 7.202015661719E-04  |
| 6.572200  | 1.240538476683E-03 | -2.903436228347E-03 | 1.954000503753E-03  | 1.706883001333E-03  | 1.706883001333E-03  | 1.954000503753E-03  | -3.804023645709E-03 |
| 6.778900  | 7.236369074490E-04 | -2.081734329285E-03 | -1.191166246519E-03 | 1.943399762789E-03  | 1.943399762789E-03  | -1.191166246519E-03 | 9.471375980340E-04  |
| 7.166000  | 1.611817555858E-04 | -8.928732587616E-04 | 2.753816102771E-04  | 1.411649413755E-03  | 1.411649413755E-03  | 2.753816102771E-04  | -1.765618955388E-03 |
| *7.431500 | 2.001209625241E-05 | -2.172276391035E-04 | -1.599705720345E-03 | 8.842373369206E-04  | 8.842373369206E-04  | -1.599705720345E-03 | 1.085282035512E-03  |

\*The last distance range ends at 7.800000 a.u..
